# Supplementary material for: A sensitive and selective electrochemical nitrite sensor based on a glassy carbon electrode modified with cobalt phthalocyanine-supported Pd nanoparticles
Source: Royal Society of Chemistry journal article supplement (doi:10.1039/c7ay01004d), 2017-01-01
Supplement: c7ay01004d1.pdf [file c7ay01004d1.pdf]

# A sensitive and selective electrochemical nitrite sensor based on glassy carbon electrode modified with Cobalt phthalocyanine-supported Pd nanoparticles

Xueying Song<sup>a</sup>, Li Gao<sup>a, \*</sup>, Yamin Li<sup>a</sup>, Liqun Mao<sup>a</sup> and Jing-He Yang<sup>a, b, \*</sup>

<sup>a</sup> College of Chemistry and Chemical Engineering, Henan University, Kaifeng, Henan 475004, P. R. China

<sup>b</sup> Research Center of Heterogeneous Catalysis and Engineering Sciences, School of Chemical Engineering and Energy, Zhengzhou University, Zhengzhou 450001, China

\* Corresponding author. E-mail: jhyang@zzu.edu.cn (J.-H. Yang), gaoli@henu.edu.cn (L. Gao)

Tel.: +86 371 23881589; Fax: +86 371 23881589.

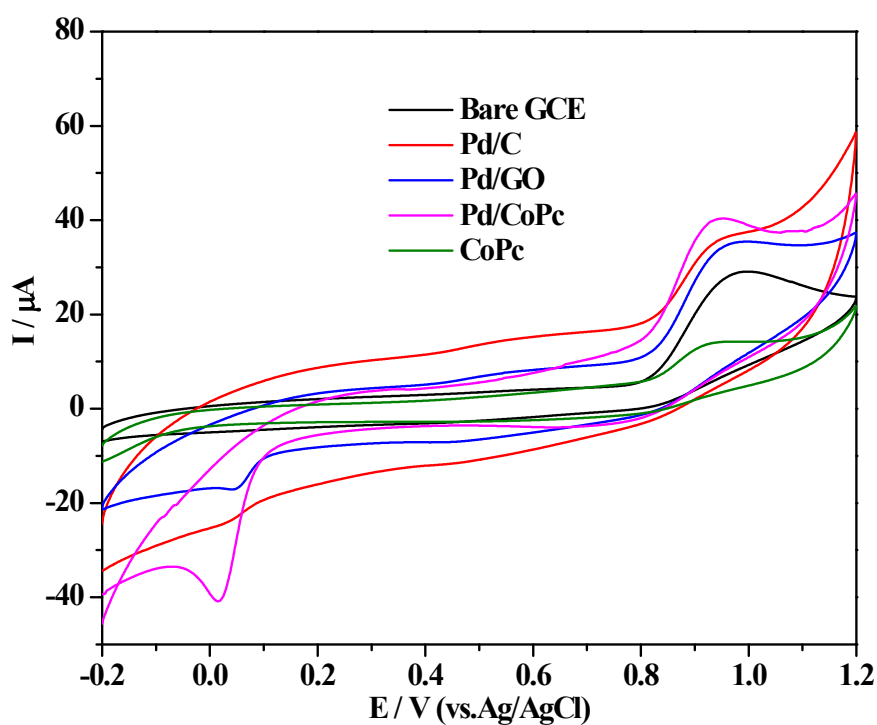

Figure S1. CV curves of bare GC electrode, Pd/C GCE, Pd/GO GCE, Pd/CoPc and

CoPc modified GCE in a 0.2 M PBS (PH=7) solution containing 1 mM NaNO<sub>2</sub> at a scan rate of 50 mV s<sup>-1</sup>.

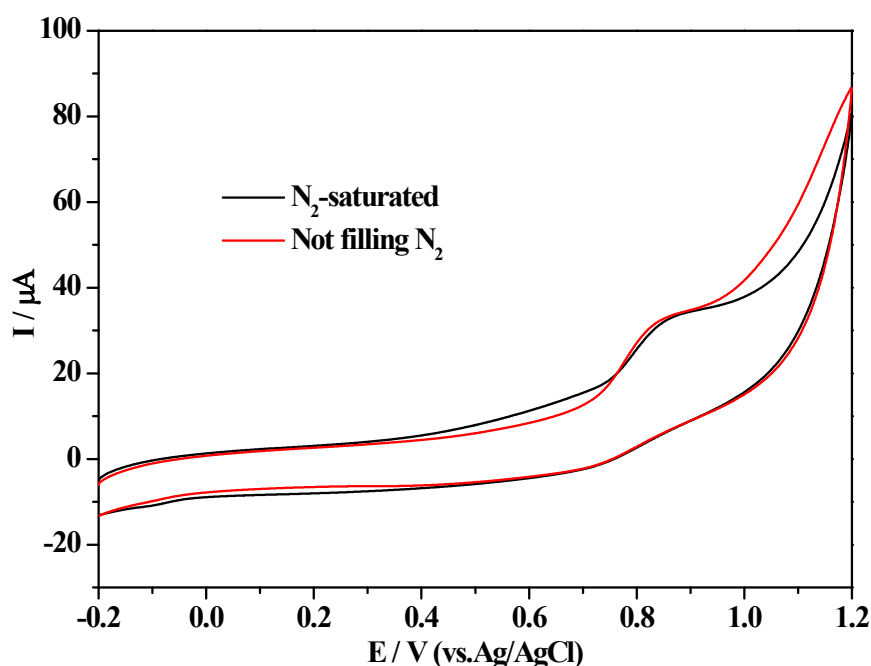

Figure S2. CV curves of Pd/CoPc modified GCE in a 0.2 M PBS (PH=7) solution containing 1 mM NaNO<sub>2</sub>.

Table S1. Comparison of Pd/CoPc modified electrode with previous reports of various electrode for nitrite sensing.

| Electrode material                               | Linear range( $\mu\text{M}$ ) | Detection limit( $\mu\text{M}$ ) | Sensitivity                          | Reference |
|--------------------------------------------------|-------------------------------|----------------------------------|--------------------------------------|-----------|
| Au/CA/Mb/MWCNT                                   | 1-280                         | 0.1                              | -                                    | [1]       |
| MWCNTs-TiN/Cyt c                                 | 1-2000                        | 0.0014                           | -                                    | [2]       |
| Urchin-like Pd/SWCNT                             | 2-238                         | 0.25                             | 0.038 $\mu\text{A}\mu\text{M}^{-1}$  | [3]       |
| CTAB-GO/MWNT                                     | 5.0-800                       | 1.5                              | -                                    | [4]       |
| TOSC-MoS <sub>2</sub>                            | 6-3140,3140-4200              | 2.0                              | -                                    | [5]       |
| AgPs-ILCPE                                       | 50-1000                       | 3                                | -                                    | [6]       |
| Fe <sub>3</sub> O <sub>4</sub> /MoS <sub>2</sub> | 2-6730                        | 1.0                              | -                                    | [7]       |
| Pd/graphite                                      | 0.3-50.7                      | 0.071                            | 0.0065 $\mu\text{A}\mu\text{M}^{-1}$ | [8]       |
| (CoTsPc/PDDAGr) <sub>n</sub>                     | 2-36                          | 0.084                            | 0.0053 $\mu\text{A}\mu\text{M}^{-1}$ | [9]       |
| Au-Pd/rGO                                        | 0.05-1000                     | 0.02                             | -                                    | [10]      |
| [TMPyPcCo/aCNTs] <sub>12</sub>                   | 5-30000                       | 2.6                              | 0.018 $\mu\text{A}\mu\text{M}^{-1}$  | [11]      |
| CoPcF-MWCNT                                      | 0.096-340                     | 0.062                            | -                                    | [12]      |
| Pd/CoPc                                          | 0.2-40,500-5000               | 0.10                             | 0.01 $\mu\text{A}\mu\text{M}^{-1}$   | This work |

## References

[1]Canbay E, Şahin B, Kıran M, et al. MWCNT-cysteamine-Nafion modified gold

- electrode based on myoglobin for determination of hydrogen peroxide and nitrite[J]. *Bioelectrochemistry*, 2015, 101: 126-131.
- [2]Haldorai Y, Hwang S K, Gopalan A I, et al. Direct electrochemistry of cytochrome c immobilized on titanium nitride/multi-walled carbon nanotube composite for amperometric nitrite biosensor[J]. *Biosensors and Bioelectronics*, 2016, 79: 543-552.
- [3]Pham X H, Li C A, Han K N, et al. Electrochemical detection of nitrite using urchin-like palladium nanostructures on carbon nanotube thin film electrodes[J]. *Sensors and Actuators B: Chemical*, 2014, 193: 815-822.
- [4]Yang Y J, Li W. CTAB functionalized graphene oxide/multiwalled carbon nanotube composite modified electrode for the simultaneous determination of ascorbic acid, dopamine, uric acid and nitrite[J]. *Biosensors and Bioelectronics*, 2014, 56: 300-306.
- [5]Wang H, Wen F, Chen Y, et al. Electrocatalytic determination of nitrite based on straw cellulose/molybdenum sulfide nanocomposite[J]. *Biosensors and Bioelectronics*, 2016, 85: 692-697.
- [6]Menart E, Jovanovski V, Hočevar S B. Silver particle-decorated carbon paste electrode based on ionic liquid for improved determination of nitrite[J]. *Electrochemistry Communications*, 2015, 52: 45-48.
- [7]Wang H, Chen P, Wen F, et al. Flower-like  $\text{Fe}_2\text{O}_3@\text{MoS}_2$  nanocomposite decorated glassy carbon electrode for the determination of nitrite[J]. *Sensors and Actuators B: Chemical*, 2015, 220: 749-754.
- [8]Yang J H, Yang H, Liu S, et al. Microwave-assisted synthesis graphite-supported Pd nanoparticles for detection of nitrite[J]. *Sensors and Actuators B: Chemical*, 2015, 220: 652-658.
- [9]Cui L, Pu T, Liu Y, et al. Layer-by-layer construction of graphene/cobalt phthalocyanine composite film on activated GCE for application as a nitrite sensor[J]. *Electrochimica acta*, 2013, 88: 559-564.
- [10]Li S S, Hu Y Y, Wang A J, et al. Simple synthesis of worm-like Au-Pd nanostructures supported on reduced graphene oxide for highly sensitive detection of

nitrite[J]. *Sensors and Actuators B: Chemical*, 2015, 208: 468-474.

[11] Zhang J, Chen Z, Wu H, et al. An electrochemical bifunctional sensor for the detection of nitrite and hydrogen peroxide based on layer-by-layer multilayer films of cationic phthalocyanine cobalt (ii) and carbon nanotubes[J]. *Journal of Materials Chemistry B*, 2016, 4(7): 1310-1317.

[12] Li P, Ding Y, Wang A, et al. Self-assembly of tetrakis (3-trifluoromethylphenoxy) phthalocyaninato cobalt (II) on multiwalled carbon nanotubes and their amperometric sensing application for nitrite[J]. *ACS applied materials & interfaces*, 2013, 5(6): 2255-2260.
